# Supplementary material for: CO2enhanced oil recovery: a catalyst for gigatonne-scale carbon capture and storage deployment?
Source: Royal Society of Chemistry journal article supplement (doi:10.1039/c7ee02102j), 2017-01-01
Supplement: c7ee02102j1.pdf [file c7ee02102j1.pdf]

## Supplementary Information

### Can CO<sub>2</sub> enhanced oil recovery catalyze gigatonne carbon capture and storage deployment?

Clea Kolster,<sup>a,b,c</sup> Mohammad S. Masnadi,<sup>d</sup> Sam Krevor,<sup>e</sup>  
Niall Mac Dowell<sup>b,c</sup> and Adam R. Brandt<sup>\*d</sup>

#### S1 MIICE MATLAB code

MIICE MATLAB script is attached.

#### S2 Model scoping and assumptions

##### S1 Model envelope

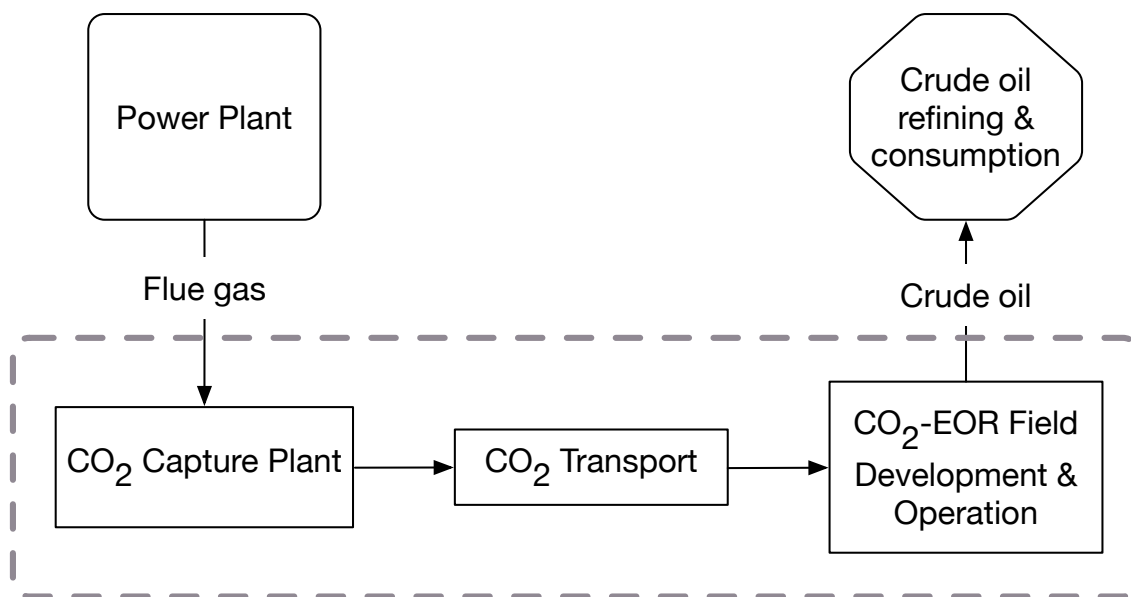

Figure S1: Conceptual representation of the CCS + CO<sub>2</sub>-EOR model envelope (dotted line box) without considering physical flow streams

\* Corresponding Author E-mail: [abrandt@stanford.edu](mailto:abrandt@stanford.edu)

<sup>a</sup> Grantham Institute for Climate Change and the Environment, Imperial College London, SW7 2AZ, UK

<sup>b</sup> Centre for Environmental Policy, Imperial College London, SW7 1NA, UK

<sup>c</sup> Centre for Process Systems Engineering, Imperial College London, SW7 2AZ, UK

<sup>d</sup> Department of Energy Resources Engineering, School of Earth, Energy & Environmental Sciences, Stanford University, CA, 94305, USA

<sup>e</sup> Department of Earth Science and Engineering, Imperial College London, SW7 2AZ, UK

## S2 CCS and CO<sub>2</sub> enhanced oil recovery field development and cost modeling

### S2.1 CO<sub>2</sub> capture cost in literature and model-based assumptions

Table S1: Real-time and literature-based capital cost values of amine-based CO<sub>2</sub> post-combustion capture plants coupled with supercritical pulverized coal fired plants adjusted to 1 MtCO<sub>2</sub> captured per year

| Reference Source              | Capital Cost Value (2016 US\$/MtCO <sub>2</sub> captured) | Information & Assumptions                                                       |
|-------------------------------|-----------------------------------------------------------|---------------------------------------------------------------------------------|
| Boundary Dam CCS [S1]         | \$1.5 billion                                             | Successfully deployed project, over-budget                                      |
| Petra Nova Parish CCS [S2–S5] | \$714 million                                             | Successfully deployed project, on-budget                                        |
| Rubin et al. Study [S6]       | \$326 million                                             | Literature based study for new build power plants with CCS                      |
| Adjusted SRCCS study [S6]     | \$270 million                                             | Literature based study conducted in 2005 [S7] for a new build power plant + CCS |
| Worley Parsons Report [S8]    | \$209 million                                             | Literature based study for a new build power plant + CCS                        |

Table S2: Operating costs for CO<sub>2</sub> capture as reported by Worley Parsons and adjusted to a MtCO<sub>2</sub> basis - all cost values adjusted to 2016 US\$.

| Parameter                           | Worley Parsons Report           | Adjusted Calculations for this Study |
|-------------------------------------|---------------------------------|--------------------------------------|
| Type of power plant considered      | Pulverized coal firing          | idem                                 |
| Type of capture technology          | Post-combustion amine scrubbing | idem                                 |
| Net Power Output                    | 546 MW                          | approx. 110 MW                       |
| Capture rate                        | 90%                             | 90%                                  |
| CO <sub>2</sub> Captured            | 4.98 Mt/year                    | 1 Mt/year                            |
| Power associated with capture plant | 87 MW                           | 17.5 MW                              |
| Cost of electricity consumed        | \$30.25 million/year            | \$6.07 million/year                  |
| Variable O&M                        | \$4.53 million/MWh              | \$0.69 million/year                  |
| Fixed O&M                           | \$11.41 million                 | \$2.29 million                       |

## S2.2 CO<sub>2</sub> transport costs

Table S3: Capital and operating costs for transport pipelines from source to sink required for projects of 1- 4MtCO<sub>2</sub>/year capture rates (M\$ = \$ million)

| Cost type                       | Function of               | 1MtCO <sub>2</sub> /year | 2 - 3MtCO <sub>2</sub> /year | >3MtCO <sub>2</sub> /year |
|---------------------------------|---------------------------|--------------------------|------------------------------|---------------------------|
| <i>Pipeline Capital Costs</i>   |                           |                          |                              |                           |
| Materials                       | Diameter (D) & Length (L) | 7.223 M\$                | 11.115 M\$                   | 15.377 M\$                |
| Labor                           | D & L                     | 28.209 M\$               | 32.976 M\$                   | 36.672 M\$                |
| Miscellaneous                   | D& L                      | 7.825 M\$                | 11.287 M\$                   | 13.815 M\$                |
| Right of Way                    | D& L                      | 2.976 M\$                | 3.172 M\$                    | 3.1547 M\$                |
| CO <sub>2</sub> surge tank      | Fixed                     | 1.332 M\$                | idem                         | idem                      |
| Pipeline control system         | Fixed                     | 0.120 M\$                | idem                         | idem                      |
| Total Capital Costs             |                           | 47.686 M\$               | 60.003 M\$                   | 75.567 M\$                |
| <i>Pipeline Operating Costs</i> |                           |                          |                              |                           |
| Operating & Maintenance         | L                         | 0.561 M\$                | idem                         | idem                      |
| Total Operating Costs           |                           | 0.561 M\$/year           | idem                         | idem                      |

## S2.3 EOR field model development and assumptions

Equation S1 is used to calculate the minimum miscibility pressure (MMP) required for CO<sub>2</sub> to be miscible with oil at injection. This is based on characteristic assumptions presented in Table S4.

$$MMP = 15.988 \times T(0.744206 + 0.0011038 \times MWC5) \quad (S1)$$

with

*MMP*: minimum miscibility pressure (psi)

*T*: reservoir temperature (Fahrenheit)

*MWC5*: molecular weight of pentanes & heavier fractions of oil

Table S4: Reservoir characteristics assumed and calculated in order to obtain fluid properties

| Parameter                                   | Value         | Unit                           | Reference           |
|---------------------------------------------|---------------|--------------------------------|---------------------|
| Median reservoir depth                      | 2026          | m                              | [S9]                |
| Pressure gradient                           | 10.52         | kPa/m                          | [S10]               |
| Temperature gradient                        | 30            | °C/km                          | [S11]               |
| Surface temperature                         | 15            | °C                             | Assumption of study |
| Reservoir pressure (P)                      | 21.3          | MPa                            | Calculated          |
| Reservoir temperature (T)                   | 75.8          | °C                             | Calculated          |
| CO <sub>2</sub> density at reservoir P & T  | 614.08        | kg/m <sup>3</sup>              | [S12]               |
| CO <sub>2</sub> viscosity at reservoir P& T | 47.8          | microPa.s                      | [S12]               |
| CO <sub>2</sub> fluid phase                 | Supercritical |                                | [S12]               |
| Average reservoir oil gravity               | 37            | API                            | [S9]                |
| MWC5+                                       | 183.67        | g/mol                          | [S13]               |
| Average MMP                                 | 17.6          | MPa                            | Calculated          |
| Formation volume factor                     | 1.3           | m <sup>3</sup> /m <sup>3</sup> | Assumption of study |

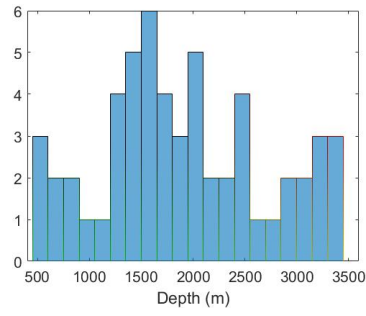

(a)

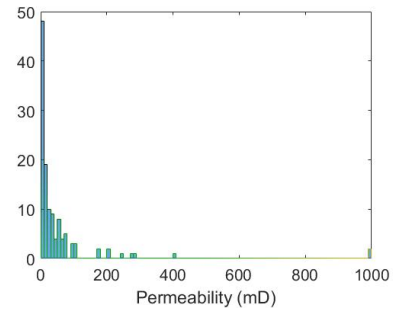

(b)

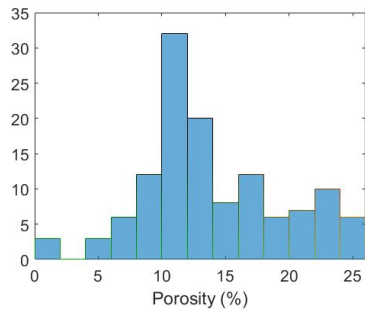

(c)

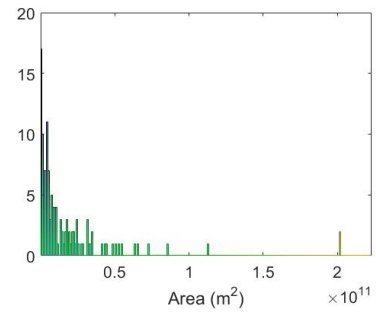

(d)

Figure S2: Distributions of reservoir characteristics including depth (m), porosity (%), permeability (mD) and field area (m<sup>2</sup>) for oil fields with CO<sub>2</sub>-EOR activity in the U.S. as well as Prudhoe Bay hydrocarbon miscible injection field based on Oil & Gas Journal 2014 Survey data.

## S2.4 CO<sub>2</sub>-EOR pattern deployment strategy description

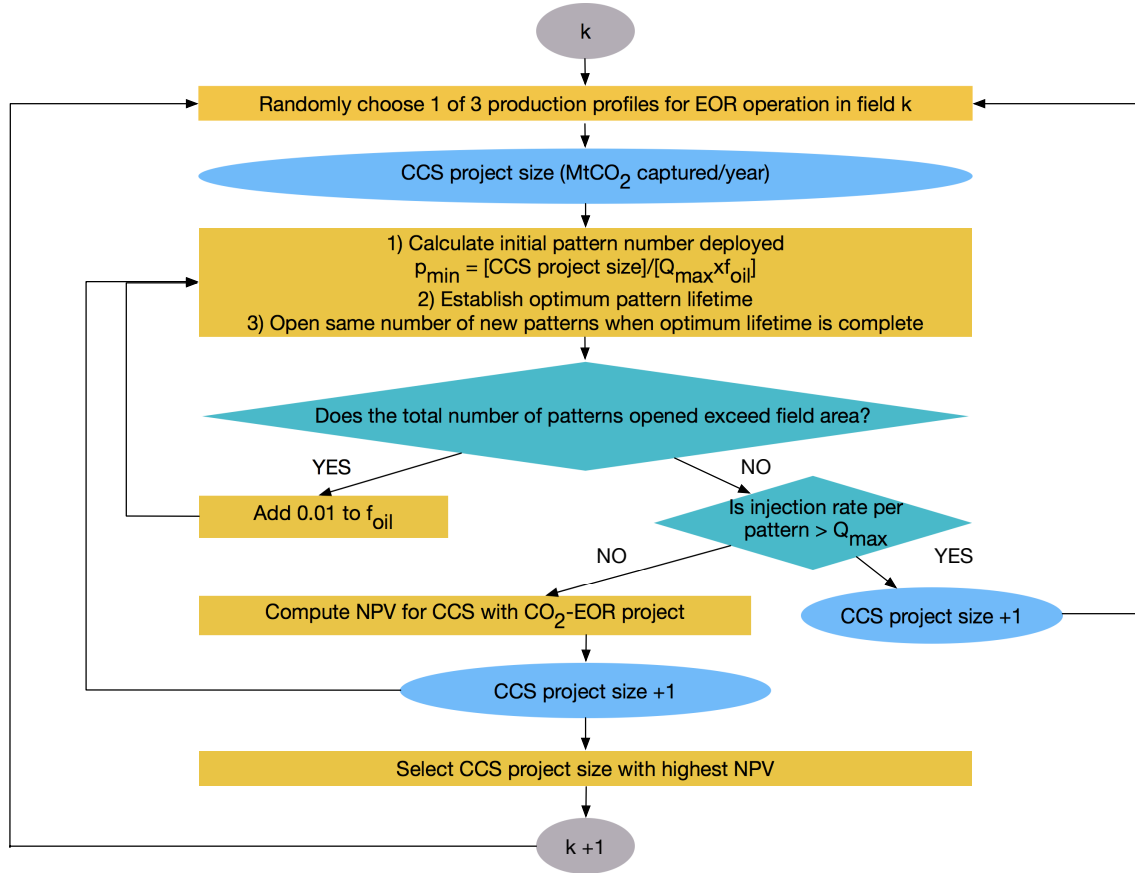

Figure S3: Flow diagram describing the decision strategy process for CO<sub>2</sub>-EOR pattern deployment within a field  $k$ .

## S2.5 EOR production profile fit parameters

Table S5: Parameters of logistic and exponential equations of curve fits for production profiles of oil and CO<sub>2</sub> as a percentage of OOIP and HCPV respectively

| Oil production fit             | d      | a      | b      | c      | RMSE/R-Square   |
|--------------------------------|--------|--------|--------|--------|-----------------|
| Low                            | 0.0    | 0.105  | 9.813  | 0.4213 | 0.001414/0.9977 |
| Medium                         | 0.01   | 0.1774 | 4.86   | 0.447  | 0.002853/0.9954 |
| High                           | 0.09   | 0.3818 | 3.449  | 0.3415 |                 |
| CO <sub>2</sub> production fit | d'     | a'     | b'     | c'     | RMSE/R-Square   |
| Low                            | 0.33   | 0.3155 | 0.8515 | 0.1492 | 0.01481/0.9751  |
| Medium                         | 0.4    | 0.6357 | 0.9292 | 0.5785 | 0.009409/0.997  |
| High                           | 0.4792 | 1.276  | 0.9086 | 1.078  |                 |

### S3 Cost inflation factors

Table S6: Inflation factors used to convert US\$ costs from literature to constant 2016 US\$ based on the Bureau of Labor Statistics Consumer Price Index inflation calculator[S14].

| Year of cost reported | Inflation factor to 2016 US\$ |
|-----------------------|-------------------------------|
| 2004                  | 1.270                         |
| 2010                  | 1.100                         |
| 2013                  | 1.030                         |
| 2014                  | 1.017                         |

### S4 Compound annual growth rates

A compound annual growth rate (CAGR) is used to compare results of cumulative CCS capacity deployed by 2050 and cumulative oil production rates to both industries' growth rate predictions. The CAGR describes a rate at which an industry would need to grow by every year, if this were at a steady rate, to achieve a final industry objective size. These rates are calculated against values of oil production from CO<sub>2</sub>-EOR in the US, which was at 156.95 MMbbl/year in 2015 [S15] and the global value for CO<sub>2</sub> captured in 2016 of 27 MtCO<sub>2</sub>/year [S16].

### S5 Slow and fast industry growth scenarios

In a slow deployment scenario, we assume that the 5-year demonstration period is followed by a growth to materiality of 20% per year (lower than the exponential growth assumed), followed by a stagnated growth of 3% per year based on a low carbon technology study by Napp et al. [S17]. Meanwhile, a much faster industry growth scenario considers that the first 5 years of project initiation has an upper bound of  $2^{year}$  project investments. In the 10 years that follow, the number of projects that can be built is limited by a 40% growth rate year on year. The 10 years that follow see a slower allowable growth rate as momentum is reduced to a 20% growth rate and the 10 years that follow are limited by a 10% yearly growth rate.

## S3 Results

### S1 Five world scenarios

#### S1.1 Cumulative CO<sub>2</sub> stored and oil produced

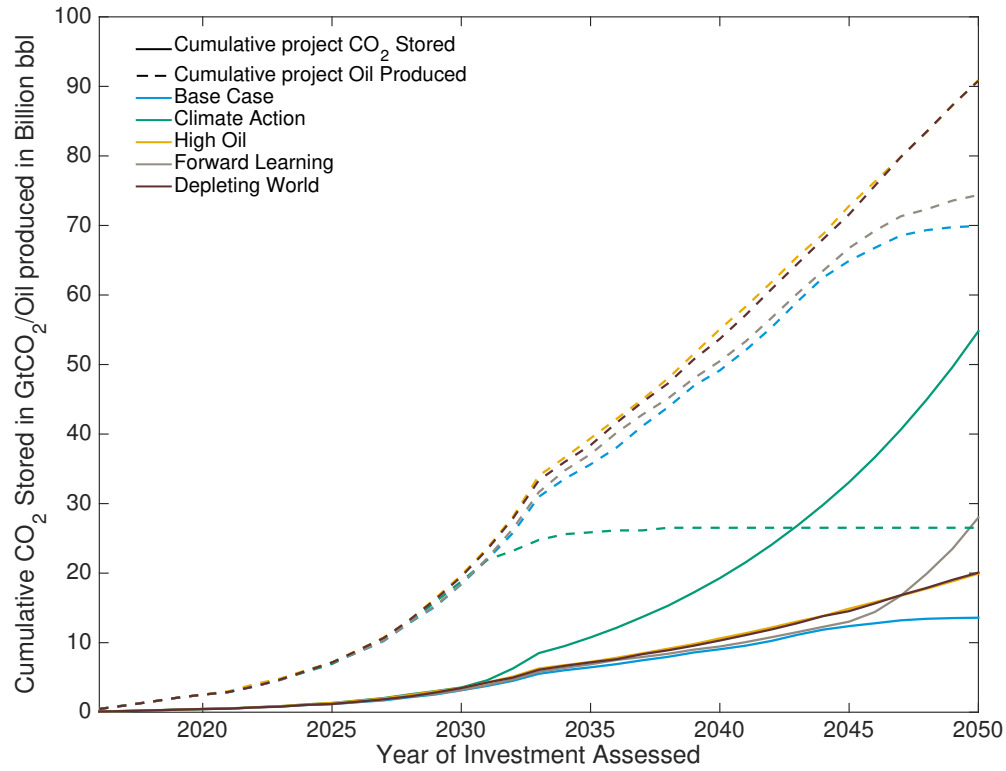

Figure S4: Graph showing cumulative CO<sub>2</sub> stored and oil produced as a result of successful projects obtained in each of the Five World Scenarios

## S1.2 Average field characteristics of successful projects

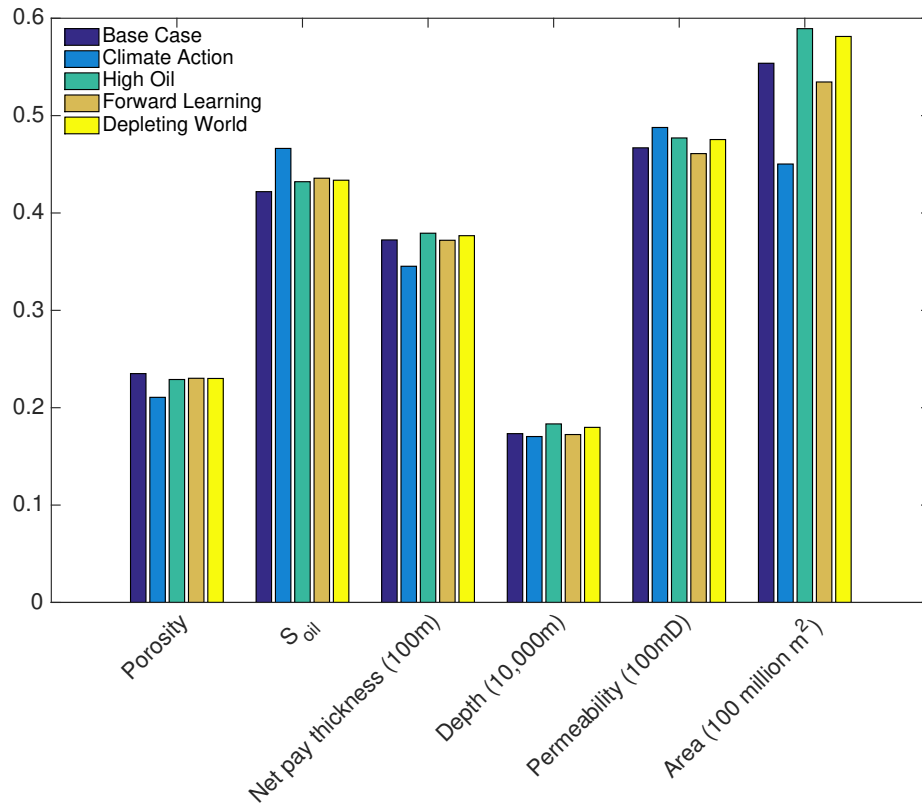

Figure S5: Bar chart showing the total average field characteristics for all successful projects resulting from each of the five world scenarios from the pool of 1000 fields

## S2 Heat maps showing sensitivity of CO<sub>2</sub> storage and oil production to 2-D variation in CO<sub>2</sub> tax, oil price, technological learning and initial capital cost of capture

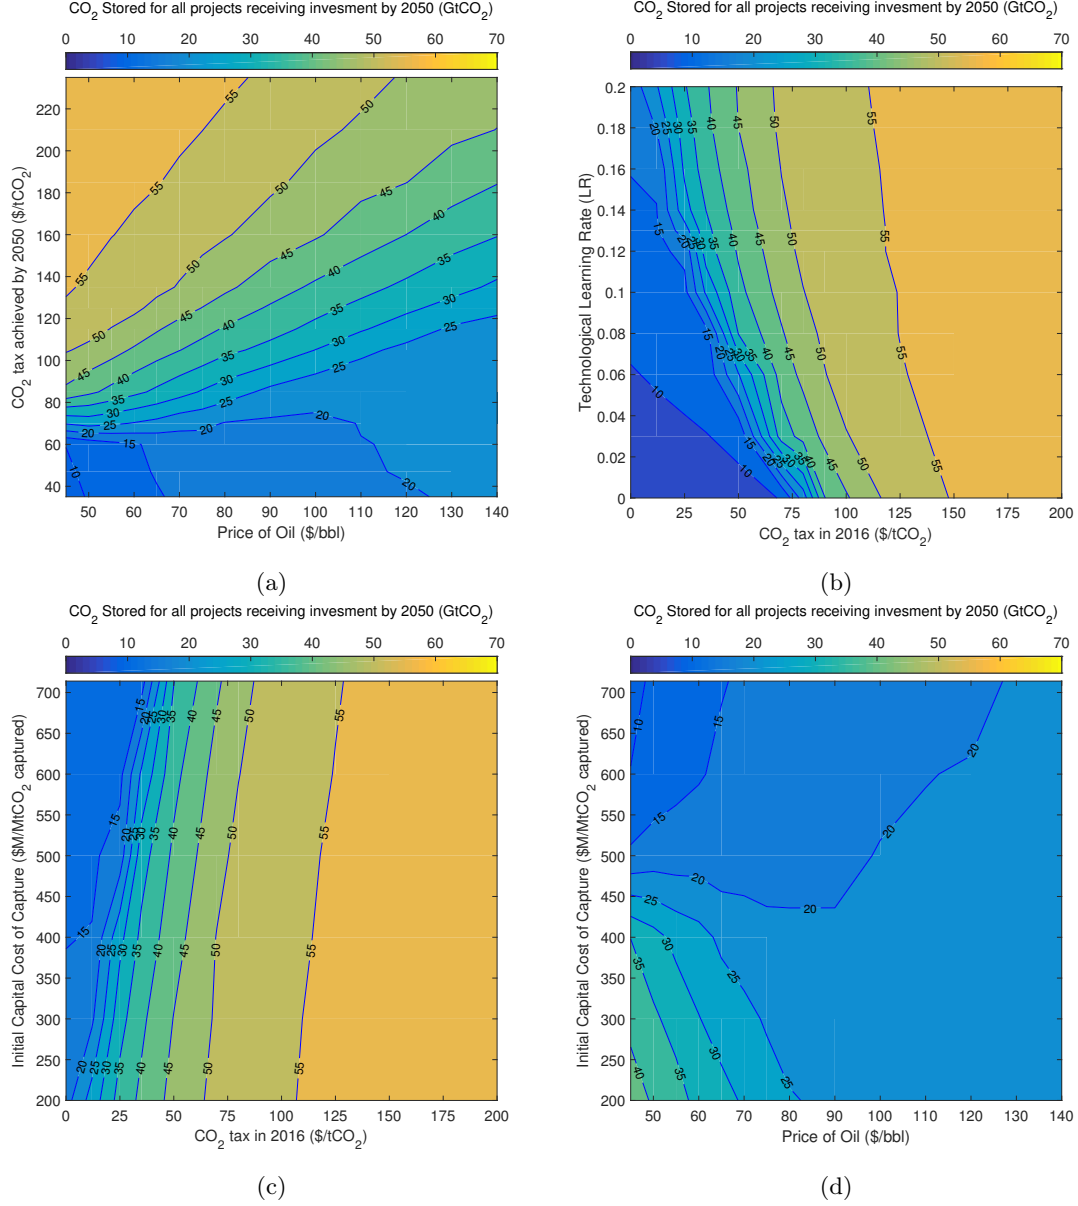

Figure S6: Heat maps showing contours of CO<sub>2</sub> storage achieved for all invested CCS with CO<sub>2</sub>-EOR projects by 2050 as a function of (a) the CO<sub>2</sub> tax achieved by 2050 and the price of oil, (b) the CO<sub>2</sub> tax in 2016 and the amount of technological learning assumed, (c) the price of oil and the initial capital cost of capture assumed per MtCO<sub>2</sub> capture capacity in 2016, and (d) the price of oil and the initial capital cost of capture assumed per MtCO<sub>2</sub> capture capacity in 2016.

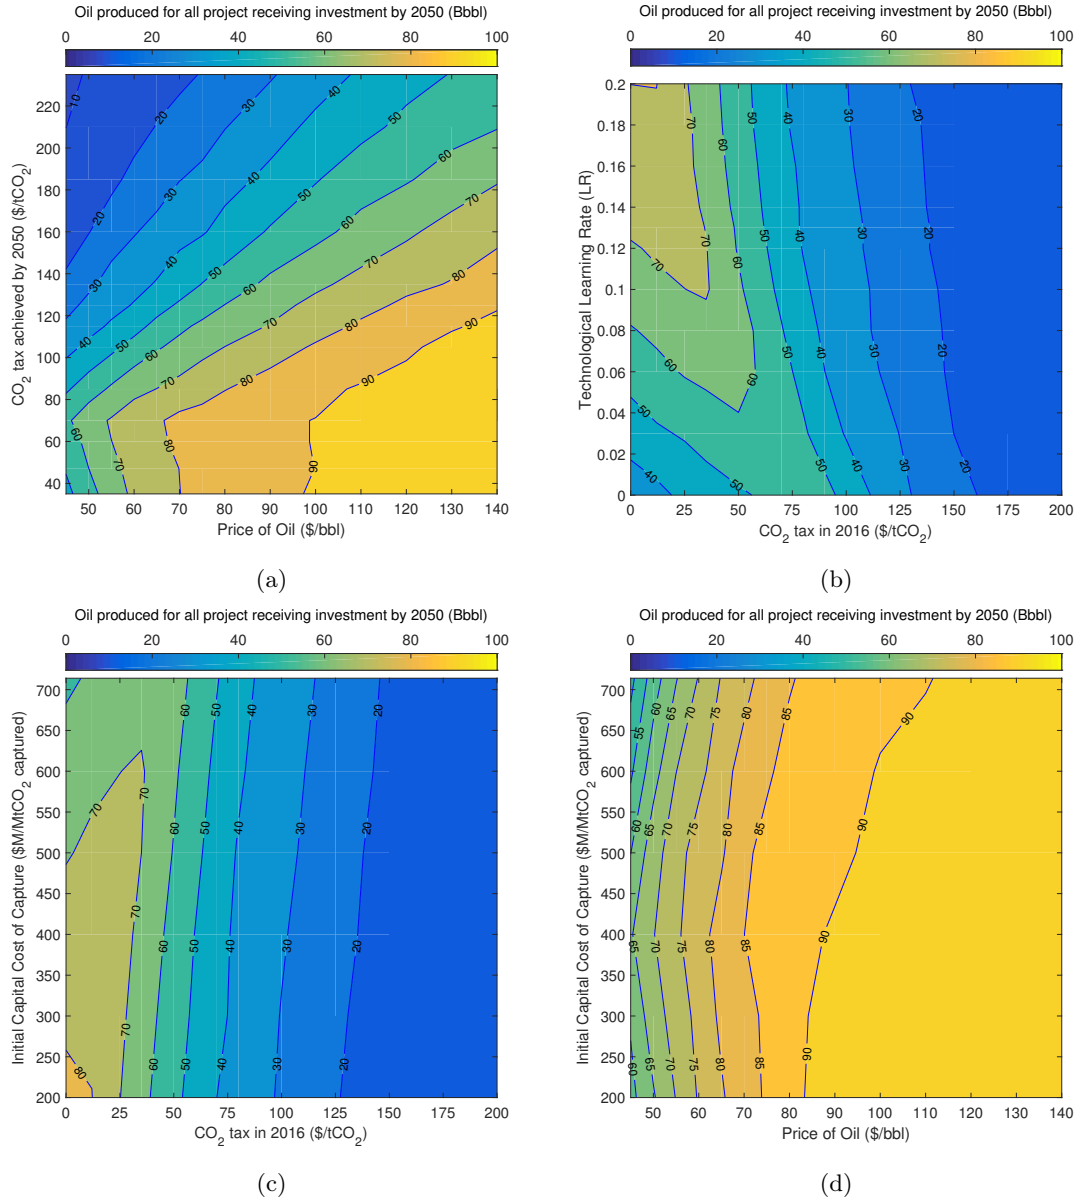

Figure S7: Heat maps showing contours of oil production for all invested CCS with CO<sub>2</sub>-EOR projects by 2050 as a function of (a) the CO<sub>2</sub> tax achieved by 2050 and the price of oil, (b) the CO<sub>2</sub> tax in 2016 and the amount of technological learning assumed, (c) the price of oil and the initial capital cost of capture assumed per MtCO<sub>2</sub> capture capacity in 2016, and (d) the price of oil and the initial capital cost of capture assumed per MtCO<sub>2</sub> capture capacity in 2016.

## References

- [1] Carbon Capture & Sequestration Technologies at MIT. Boundary Dam Fact Sheet: Carbon Dioxide Capture and Storage Project. [https://sequestration.mit.edu/tools/projects/boundary\\_dam.html](https://sequestration.mit.edu/tools/projects/boundary_dam.html). Accessed on January 18, 2017.
- [2] NRG. News Release: NRG Energy, JX Nippon Complete World’s Largest Post-Combustion Carbon Capture Facility On-Budget and On-Schedule. <http://investors.nrg.com/phoenix.zhtml?c=121544&p=irol-newsArticle&ID=2236424>, 2017. Accessed on February 6, 2017.
- [3] U.S. Department of Energy, National Energy Technology Laboratory (NETL). Recovery Act: Petra Nova Parish Holdings: W.A. Parish Post-Combustion CO<sub>2</sub> Capture and Sequestration Project. <https://www.netl.doe.gov/research/coal/project-information/fe0003311>, 2016. Accessed on February 6, 2017.
- [4] U.S. Office of Fossil Energy. Petra Nova - W.A. Parish Project. <https://energy.gov/fe/petra-nova-wa-parish-project>, 2017. Accessed on January 17, 2017.
- [5] Carbon Capture & Sequestration Technologies at MIT. Petra Nova W.A. Parish Fact Sheet: Carbon Dioxide Capture and Storage Project. [https://sequestration.mit.edu/tools/projects/wa\\_parish.html](https://sequestration.mit.edu/tools/projects/wa_parish.html), 2016. Accessed on January 20, 2017.
- [6] E. S. Rubin, J. E. Davison, and H. J. Herzog. The cost of CO<sub>2</sub> capture and storage. *International Journal of Greenhouse Gas Control*, 40:378–400, 2015.
- [7] IPCC Special Report on Carbon Dioxide Capture and Storage. Technical report, Prepared by Working Group III of the Intergovernmental Panel on Climate Change [Metz, B. and Davidson, O. and de Coninck, H. C. and Loos, M. and Meyer L. A. (eds.)], Cambridge University Press, Cambridge, United Kingdom and New York, NY, USA, 442 pp., 2005.
- [8] Simpson, J. and McConnel, C. and Matsuda, Y. Economic Assessment of Carbon Capture and Storage Technologies: 2011 update. Technical report, Worley Parsons and Schlumberger, 2011.
- [9] Leena Koottungal. 2014 worldwide EOR survey. Data report, Oil & Gas Journal, 2014.
- [10] Schlumberger. Pore-Pressure Gradient Definition. <http://www.glossary.oilfield.slb.com/Terms/p/pore-pressure-gradient.aspx>, 2017. Accessed on January 10, 2017.
- [11] James P. Meyer. Summary of Carbon Dioxide Enhanced Oil Recovery CO<sub>2</sub> EOR Injection Well Technology. Background report, American Petroleum Institute, 2007.
- [12] R. Span and W. Wagner. A New Equation of State for Carbon Dioxide, Covering the Fluid Region from the Triple Point Temperature to 1100 K at Pressures up to 800 MPa. *J. Phys. Chem. Ref. Data.*, 25:1509–1596, 1996.
- [13] IEA Greenhouse Gas R&D Program (IEA GHG). CO<sub>2</sub> Storage in Depleted Oilfields: Global Application Criteria for Carbon Dioxide Enhanced Oil Recovery. 2009/12 December, 2009.
- [14] United States Department of Labor: Bureau of Labor Statistics. Databases, Tables & Calculators by Subject: CPI Inflation Calculator. [https://www.bls.gov/data/inflation\\_calculator.htm](https://www.bls.gov/data/inflation_calculator.htm). Accessed on January 10, 2017.
- [15] Godec, Michael. In *CO<sub>2</sub>-EOR and CCUS: Worldwide Potential and Commercial Drivers*, SPE Annual Technical Conference and Exhibition Special Session: CO<sub>2</sub>-EOR as a Pathway for CCUS, 2014. Amsterdam, Netherlands, October 2014.
- [16] Global CCS Institute. Large Scale CCS Facilities: Project Database. <https://www.globalccsinstitute.com/projects/large-scale-ccs-projects>, 2017. Accessed on November 1, 2017.

- [17] Napp, T. and Bernie, D. and Thomas, R. and Lowe, J. and Hawkes, A. and Ghambir, A. Exploring the Feasibility of Low-Carbon Scenarios Using Historical Energy Transition Analysis. *Energies*, 10, 2017.
